# Supplementary material
Source: HighWire-hosted journal article supplement (https://jech.bmj.com/content/76/7/660)

**Supplementary Figure 1.** Monthly excess deaths (%) by broad occupational group: men aged 20-64 years, England and Wales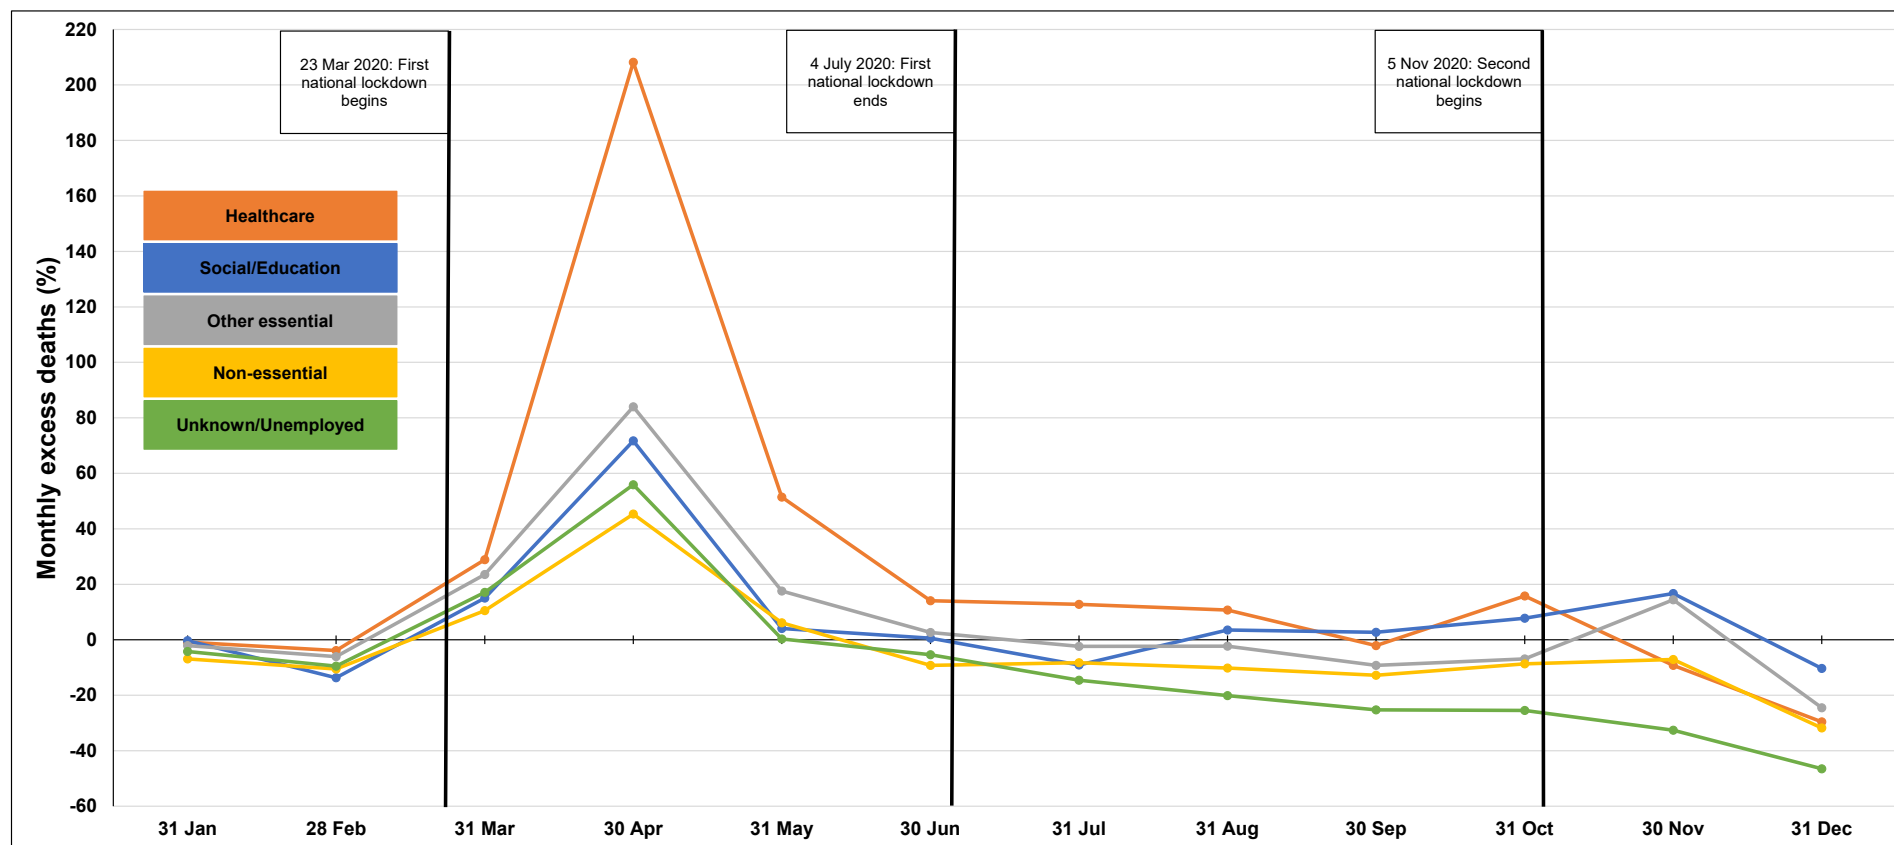

Supplement: inline-supplementary-material-7 [file inline-supplementary-material-7.pdf]
